# Supplementary material for: Genetic analysis of an elite super-hybrid rice parent using high-density SNP markers
Source: PubMed Central journal article supplement (PMC4883714; doi:10.1186/1939-8433-6-21), 2013-08-15
Supplement: 12284_2013_57_MOESM9_ESM.pdf [file 12284_2013_57_MOESM9_ESM.pdf]

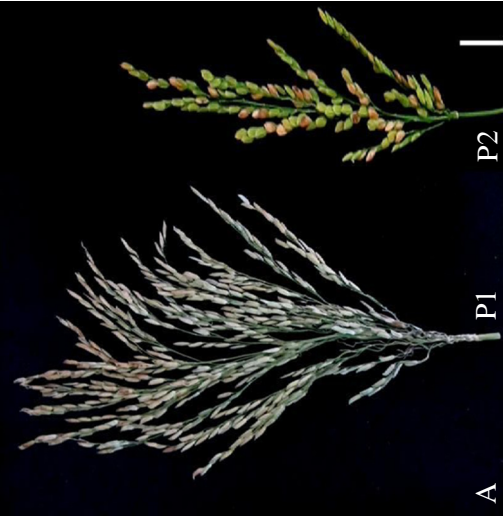

**A**

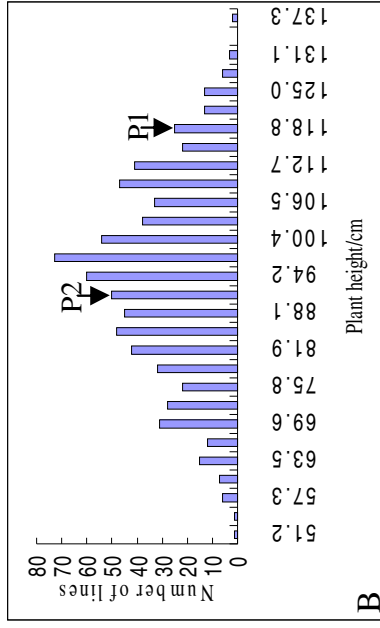

**B**

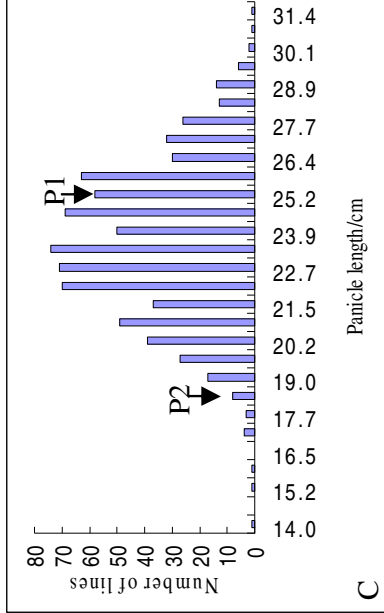

**C**

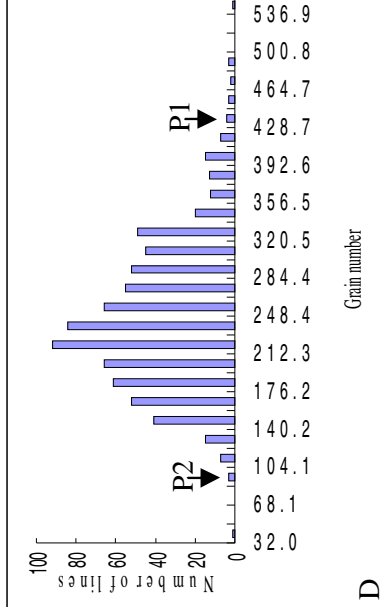

**D**

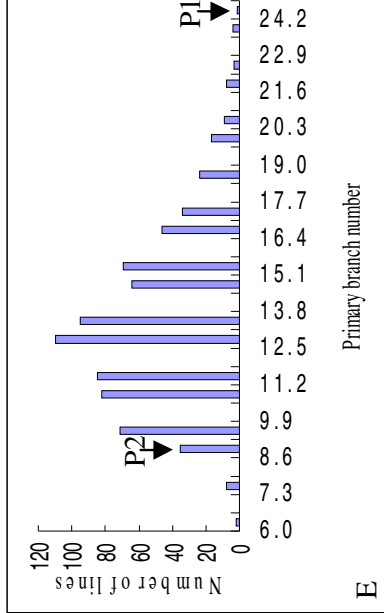

**E**

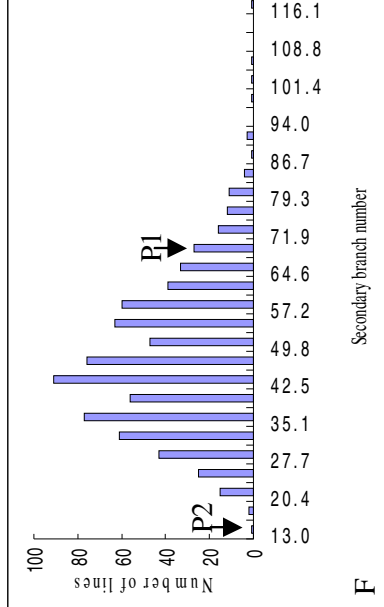

**F**
