# Supplementary material for: Genetic analysis of an elite super-hybrid rice parent using high-density SNP markers
Source: PubMed Central journal article supplement (PMC4883714; doi:10.1186/1939-8433-6-21), 2013-08-15

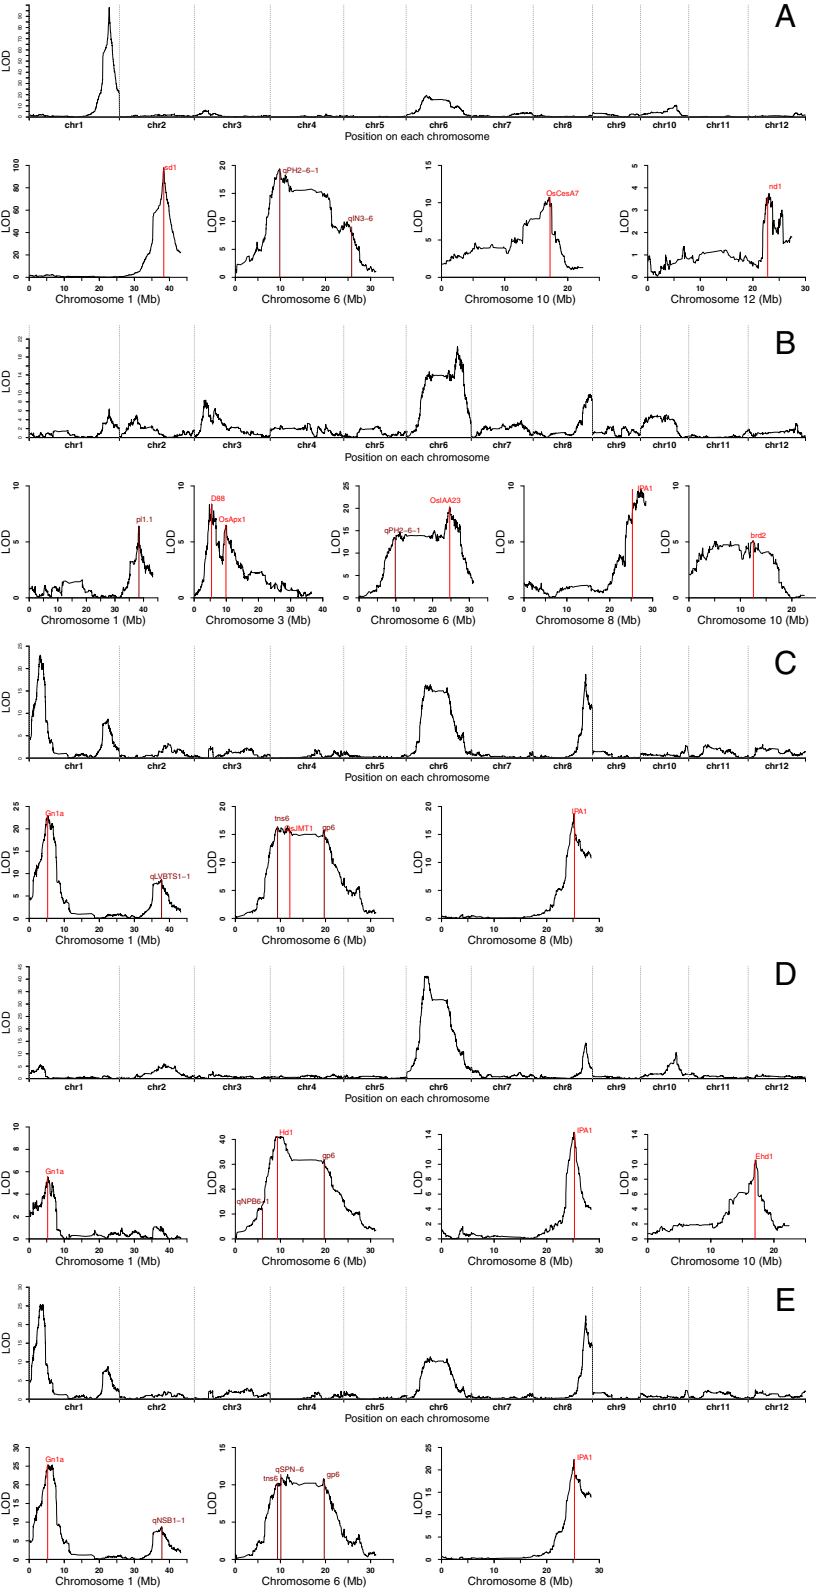

Supplement: 12284_2013_57_MOESM11_ESM.pdf [file 12284_2013_57_MOESM11_ESM.pdf]
